# Supplementary material for: Improvement of Alkali Metal Resistance for NH3-SCR Catalyst Cu/SSZ-13: Tune the Crystal Size
Source: MDPI journal article supplement (doi:10.3390/catal11080979), 2021-08-16
Supplement: s1 [file s1]

# Improvement of Alkali Metal Resistance for NH<sub>3</sub>-SCR Catalyst Cu/SSZ-13: Tune the Crystal Size

Zexiang Chen <sup>1</sup>, Meiqing Shen <sup>1,2</sup>, Chen Wang <sup>1,3</sup>, Jianqiang Wang <sup>1</sup>, Jun Wang <sup>1,\*</sup> and Gurong Shen <sup>4,\*</sup>

<sup>1</sup> School of Chemical Engineering & Technology, Tianjin University, Tianjin 300072, China; tjuczx@tju.edu.cn (Z.C.); mqshen@tju.edu.cn (M.S.); chenwang87@tju.edu.cn (C.W.); jianqiangwang@tju.edu.cn (J.W.)

<sup>2</sup> Collaborative Innovation Centre of Chemical Science and Engineering (Tianjin), Tianjin 300072, China

<sup>3</sup> School of Environmental and Safety Engineering, North University of China, Taiyuan 030051, China

<sup>4</sup> School of Materials Science and Engineering, Tianjin University, Tianjin 300350, China

\* Correspondence: wangjun@tju.edu.cn (J.W.); gr\_shen@tju.edu.cn (G.S.)

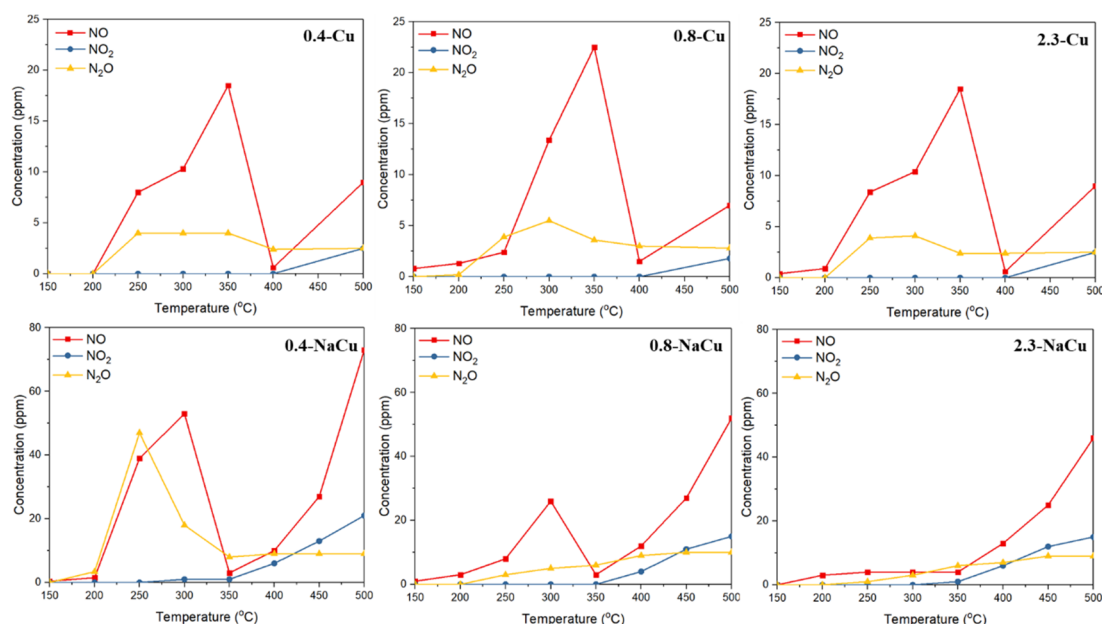

Figure S1. NO<sub>x</sub> and N<sub>2</sub>O concentration evolution in the NH<sub>3</sub> oxidation.

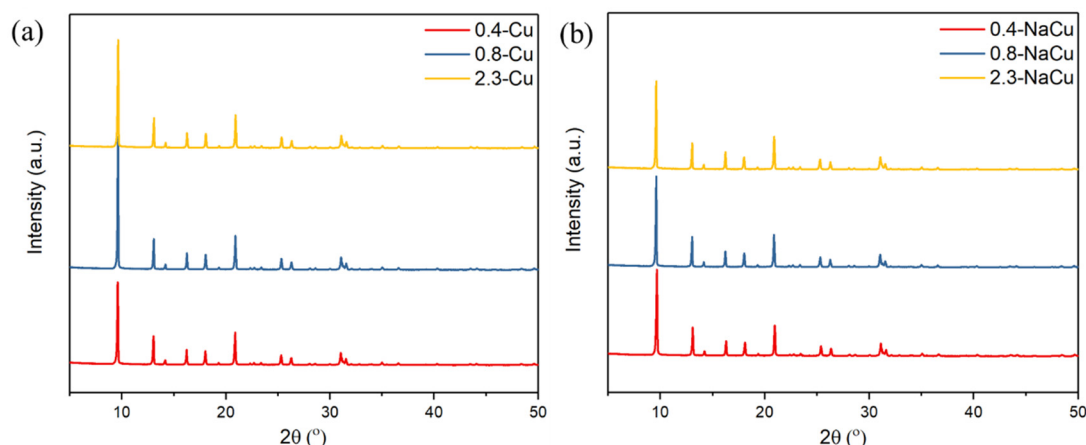

**Figure S2.** XRD patterns of Cu/SSZ-13 (a) before and (b) after Na poisoning.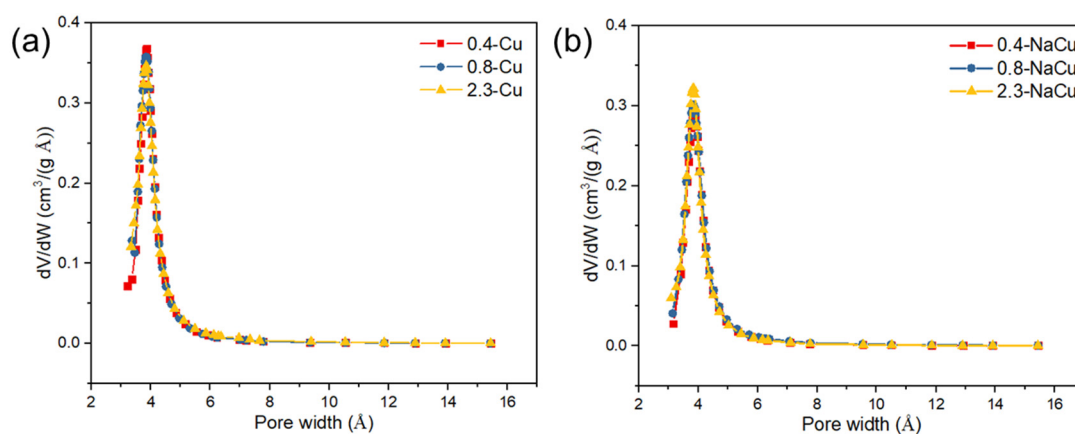**Figure S3.** The micropore distribution of Cu/SSZ-13 (a) before and (b) after Na poisoning.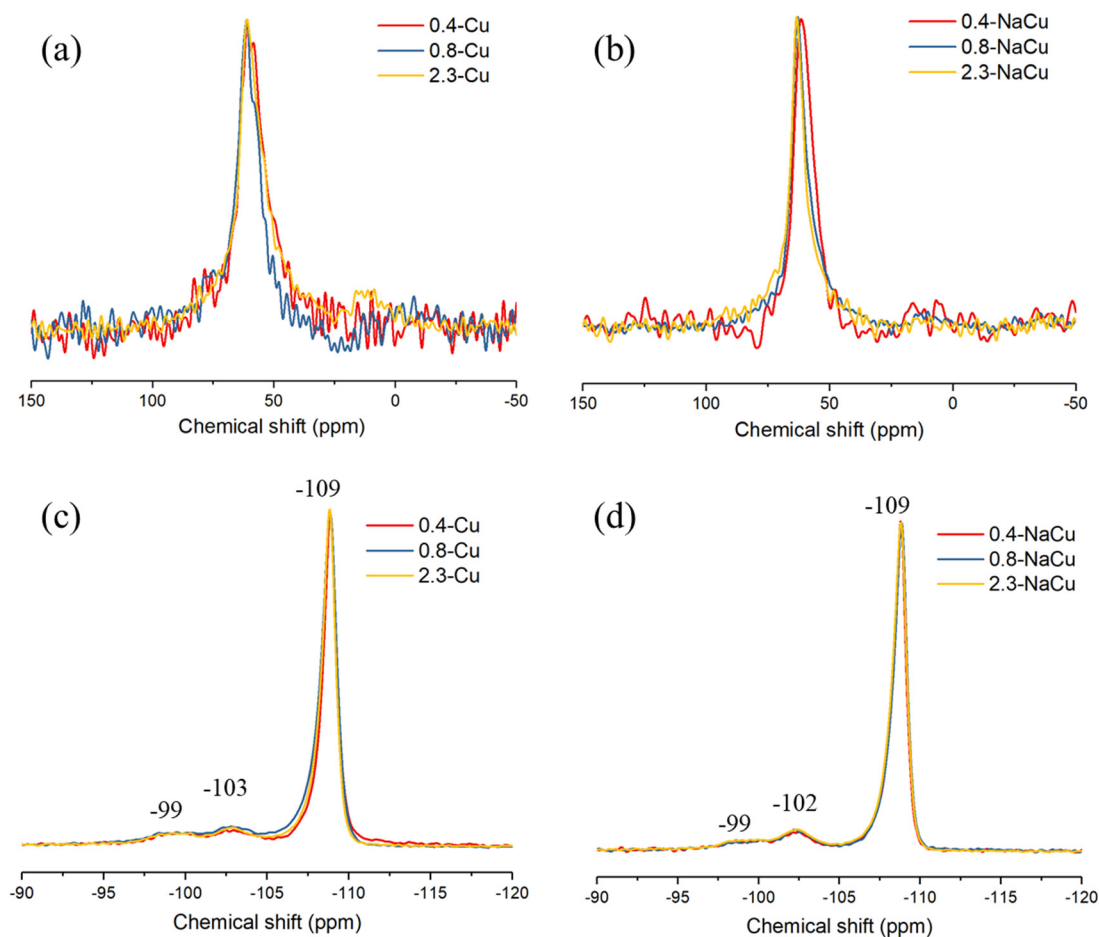**Figure S4.** (a-b)  $^{27}\text{Al}$  NMR spectra and (c-d)  $^{29}\text{Si}$  NMR spectra of CuSSZ-13 before and after Na poisoning.

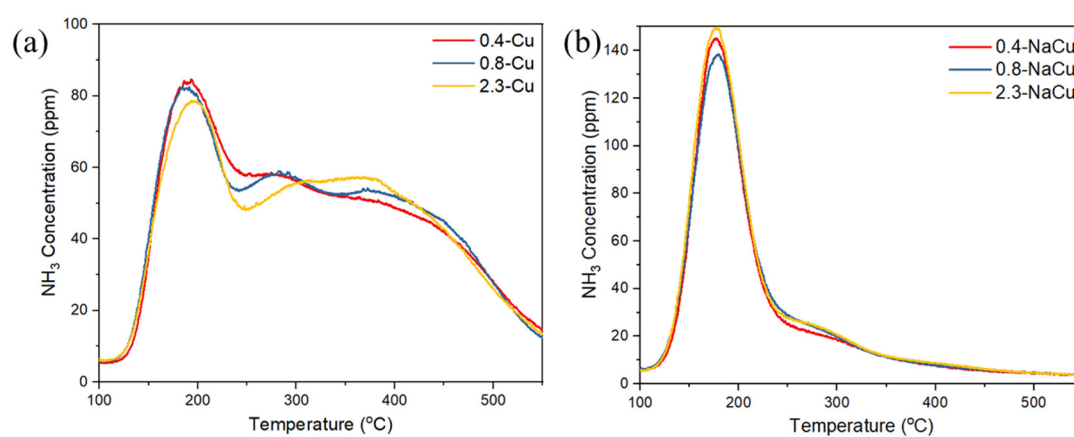

**Figure S5.** NH<sub>3</sub>-TPD profiles of Cu/SSZ-13 with different crystal sizes (a) before and (b) after Na poisoning.

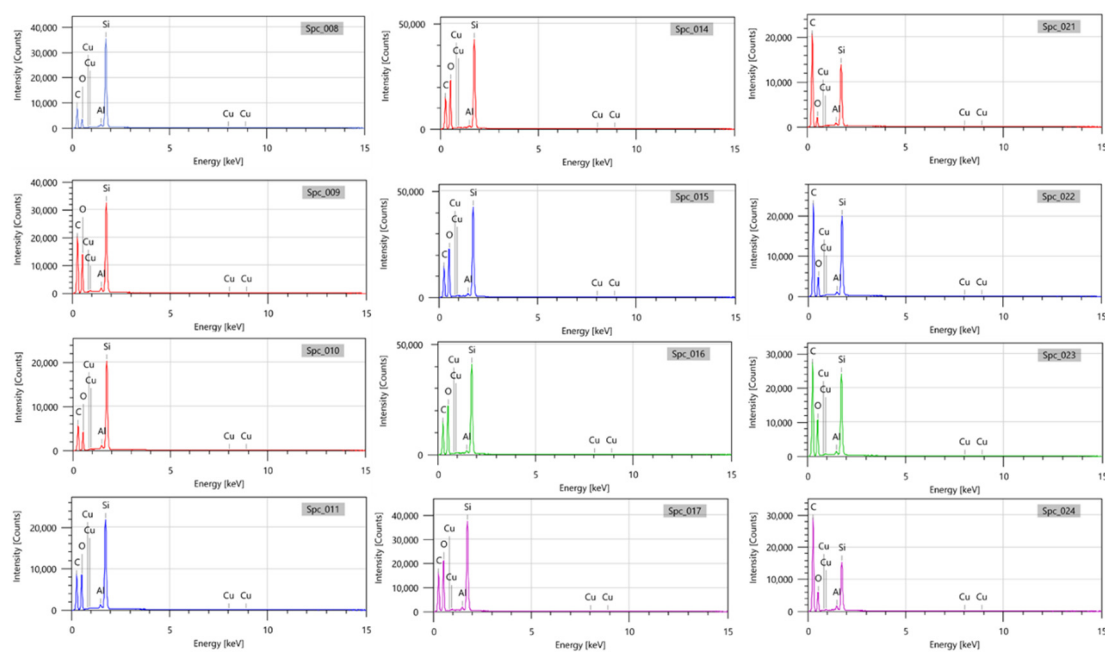

**Figure S6.** Point EDS spectra corresponding to the results in Figure 9.

**Table S1.** Element composition of Cu/SSZ-13 and Na-poisoned counterparts with different crystal sizes.

| Samples                                                                                                                                                                                                                                                                                                                                                                                                             |                                |                               |                       |
|---------------------------------------------------------------------------------------------------------------------------------------------------------------------------------------------------------------------------------------------------------------------------------------------------------------------------------------------------------------------------------------------------------------------|--------------------------------|-------------------------------|-----------------------|
|  <p><b>Copyright:</b> © 2021 by the authors. Licensee MDPI, Basel, Switzerland. This article is an open access article distributed under the terms and conditions of the Creative Commons Attribution (CC BY) license (<a href="http://creativecommons.org/licenses/by/4.0/">http://creativecommons.org/licenses/by/4.0/</a>).</p> | Si/Al molar ratio <sup>1</sup> | Cu content <sup>2</sup> (wt%) | Na <sup>2</sup> (wt%) |
|                                                                                                                                                                                                                                                                                                                                                                                                                     |                                |                               |                       |
| 0.4-Cu                                                                                                                                                                                                                                                                                                                                                                                                              | 25.2                           | 1.05                          | -                     |
| 0.8-Cu                                                                                                                                                                                                                                                                                                                                                                                                              | 24.8                           | 1.38                          | -                     |
| 2.3-Cu                                                                                                                                                                                                                                                                                                                                                                                                              | 25.4                           | 1.44                          | -                     |
| 0.4-NaCu                                                                                                                                                                                                                                                                                                                                                                                                            | -                              | 1.04                          | 2.05                  |
| 0.8-NaCu                                                                                                                                                                                                                                                                                                                                                                                                            | -                              | 1.30                          | 1.97                  |
| 2.3-NaCu                                                                                                                                                                                                                                                                                                                                                                                                            | -                              | 1.36                          | 2.09                  |

1. Si/Al ratio is measured by XRF.

2. Cu and Na contents are measured by ICP.
